# Supplementary material for: A novel Pt(iv) mono azido mono triazolato complex evolves azidyl radicals following irradiation with visible light
Source: Royal Society of Chemistry journal article supplement (doi:10.1039/c9dt01156k), 2019-01-01
Supplement: c9dt01156k1.pdf [file c9dt01156k1.pdf]

## A novel Pt(IV) *mono azido mono triazolato* complex evolves azidyl radicals following irradiation with visible light

### Electronic Supplementary Information

Kezi Yao, Arnau Bertran, Jacques Morgan, Samuel M. Hare, Nicholas H. Rees, Alan M. Kenwright, Katharina Edkins, Alice M. Bowen, Nicola J. Farrer

#### Contents

|                                                   |    |
|---------------------------------------------------|----|
| General procedures.....                           | 1  |
| Synthetic procedures .....                        | 2  |
| Characterisation of complex 3 .....               | 4  |
| ESI-MS, MS/MS and HRMS of complex 3 (3a/3b) ..... | 6  |
| UV-Vis spectra.....                               | 10 |
| IR spectra .....                                  | 11 |
| NMR kinetics .....                                | 12 |
| X-Ray crystallographic data and tables.....       | 14 |
| Photochemistry of 3 .....                         | 17 |
| EPR experimental data.....                        | 18 |
| References .....                                  | 22 |

#### General procedures

**Materials and Methods.**  $K_2[PtCl_4]$  was purchased from Precious Metals Online. HPLC-grade solvents and Millipore-filtered  $H_2O$  were used for the preparation of compounds and purification by HPLC. DMPO ( $\geq 98\%$ ) was purchased from Cambridge Bioscience Ltd. All other reagents were purchased from Sigma-Aldrich or Alfa Aesar and used as received. (IM) indicates use of a nylon syringe filter (pore size  $0.2\ \mu M$ ). All manipulations were carried out under reduced lighting and solutions were prepared stored and handled with minimal exposure to light. **NMR spectroscopy.** Due to the potential photosensitivity of the compounds, amberised NMR spectroscopy tubes (Goss Scientific/Norrell) were used. Spectra were acquired at 298 K unless otherwise stated, and processed using Topspin 3.2. All chemical shift ( $\delta$ ) values are given in parts per million and are referenced to residual solvent unless otherwise stated,  $J$  values are quoted in Hz.  **$^1H$  and  $^{195}Pt$  NMR:** were acquired on a Bruker AVIIIHD 500 MHz (500.13 MHz) equipped with a 5mm z-gradient broadband X-19F/1H BBFO SMART probe or a Bruker AVIIIHD 400 nanobay (400.17 MHz).  **$^{13}C$  NMR:** acquired on a Bruker AVII 500 MHz spectrometer equipped with a z-gradient triple resonance inverse  $^1H/^{19}F(^{13}C)$  TXI probe.  **$^1H$ - $^{195}Pt$  HMBC NMR spectra:**  $^{195}Pt$  chemical shifts were externally referenced to

$K_2PtCl_6$  in 1.5 mM HCl in  $D_2O$  ( $\delta$  0 ppm). **Mass Spectrometry:** low resolution ESI-MS were obtained with a Waters Micromass LCT Premier XE spectrometer. **HRMS:** obtained with a Thermofisher Exactive Plus with a Waters Acuity UPLC system. **MS/MS experiments:** were performed on an Acuity UPLC in flow injection analysis mode, equipped with a Waters Xevo G25 QTOF. All MS data were processed using MassLynx 4.0. **HPLC:** were performed with a Waters Autopurification system, equipped with a Waters X-Bridge OBD semi-prep column (5  $\mu$ m, 19 mm x 50 mm), with an injection loop of 1 ml, eluting with  $H_2O+0.1\%$   $NH_4OH$  (pH 9)/MeCN +0.1%  $NH_4OH$ . The crude samples (in  $H_2O/MeCN$ ) were filtered (nylon, 0.2  $\mu$ m) and injected in 750  $\mu$ L aliquots, with mass-directed purification with an ACQUITY QDa performance mass spectrometer. Analytical HPLC used the same solvents and system, with a Waters X-Bridge OBD column (5 $\mu$ m, 4.6mm x 50mm) and an injection loop of 0.02 ml. Retention times ( $t_R$ ) are quoted for the solvent gradient: 0 min (95% A : 5% B); 1 min (95:5), 7.5 min (5:95) on the analytical column. **UV-visible absorption spectra** were acquired with the Waters HPLC (Figure S7) or a UV-Vis spectrometer (Cary 60 UV-Vis, Agilent Technologies, Figure S12). **Photochemistry:** samples were irradiated with stirring at a distance of 50 mm from a MiniSun GU10 27 SMD LED bulb with an output centred at 452 nm (see **Figure S11**) or with a MiniSun UVA bulb.

### Synthetic procedures

**Caution!** No problems were encountered during this work, however heavy metal azides are known to be shock sensitive detonators, therefore it is essential that platinum azides compound are handled with care.

*Trans, trans, trans*-[Pt<sup>IV</sup>(N<sub>3</sub>)<sub>2</sub>(OH)<sub>2</sub>(py)<sub>2</sub>] (**1**) was prepared from  $K_2PtCl_4$  as previously reported and was purified by HPLC before use.<sup>2</sup>

#### **Reaction of 1 with 1,4-diphenyl-2-butyne-1,4-dione (2) to give complex 3 (3a/3b).**

1,4-diphenyl-2-butyne-1,4-dione (70 mg, 0.299 mmol) was dissolved in MeCN (22 ml). *Trans,trans,trans*-[Pt(N<sub>3</sub>)<sub>2</sub>(OH)<sub>2</sub>(py)<sub>2</sub>] (150 mg, 0.318 mmol) was added whilst stirring at 35 °C for 48 h. The solvent volume was reduced to 5 ml *in vacuo*, syringe filtered and purified by HPLC. HPLC revealed three *mono* substituted products at  $t_R$  = 4.0 min (**A**, **5**), 4.3 min (major product, complex **3a/b**) and 5.4 min (**C**), and one *bis* substituted product  $t_R$  = 5.9 min (**bis**). Complexes **5**, **3a/b** and **C** were isolated and the solvent removed by freeze-drying. Complex **3a/3b** was isolated as a pale yellow solid (60 mg, 0.085 mmol, 28 %). Subsequent analysis of **3** confirmed that it was an equilibrium mixture of two isomers: **3a** and **3b**.

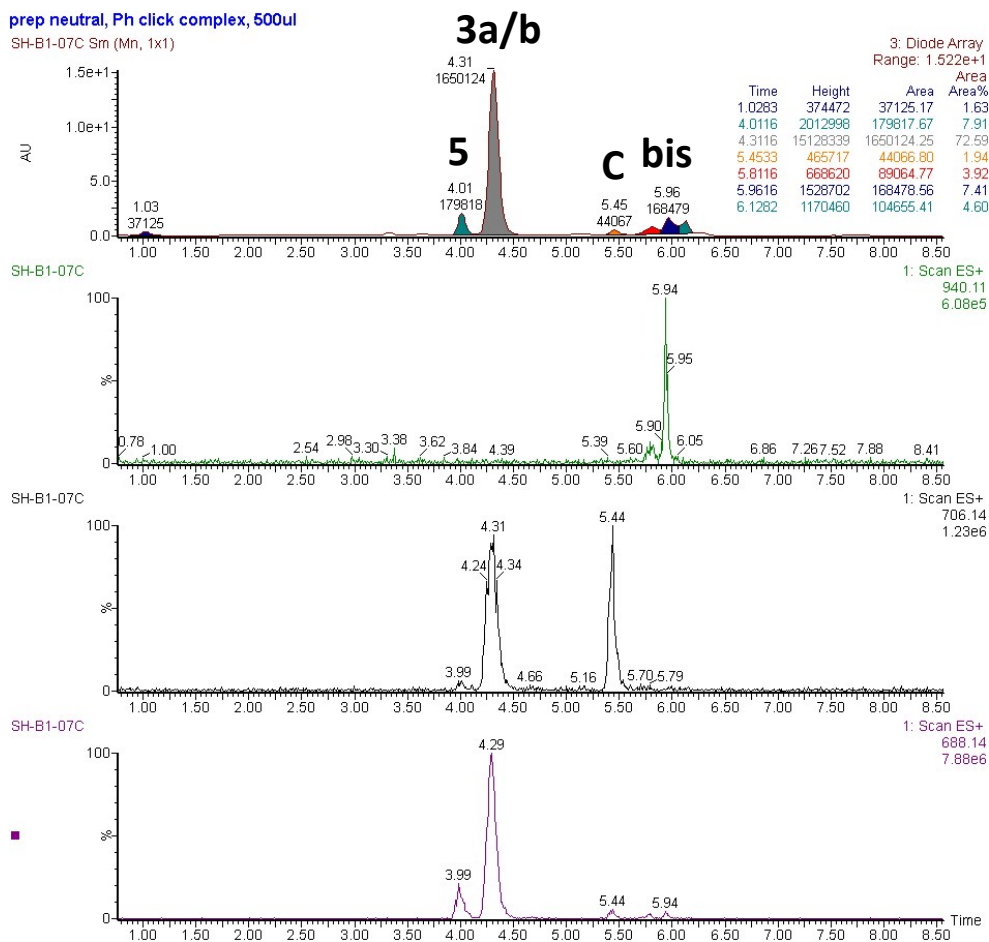

**Figure S1.** HPLC trace of crude mixture from reaction between complex **1** and **2** showing product distribution.  $t_R = 4.01$  min (**5**, **8%**),  $4.31$  min (complex **3a/3b**, **73%**) and  $5.44$  min (**C**, **2%**) and *bis* substituted product  $t_R = 5.94$  min (**bis**, **7%**). Unreacted starting material (**1**) is detected at  $1.03$  min. Relative product distributions are calculated by relative UV-Vis spectral absorbance integrated over the range  $210$  nm –  $400$  nm.

## Characterisation of complex 3

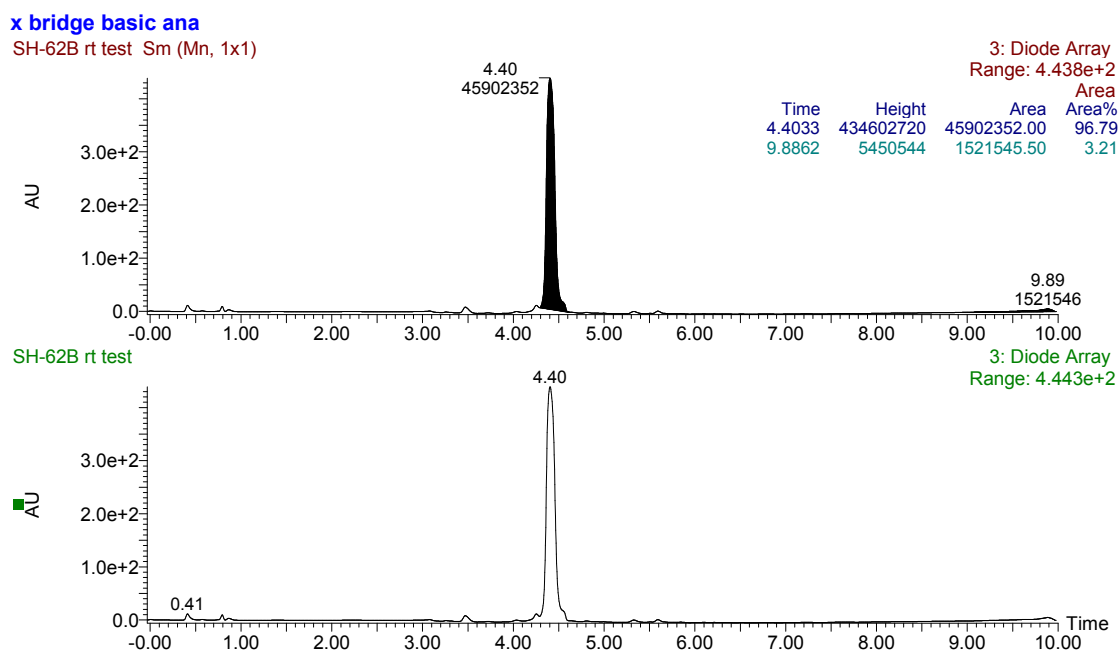

**Figure S2.** Analytical RP-HPLC trace of **3** showing co-elution of the two interconverting isomers **3a** and **3b**.

**Complex 3 (3a/3b) (major product  $t_R = 4.3$  min):**

$^1\text{H NMR}$  (500 MHz,  $d_3$ -MeCN)  $\delta$ : 9.13 (dd,  $^3J_{\text{HPT}} = 27.6$ ,  $^3J_{\text{HH}} = 6.7$ , 2H, **3b**<sub>Pyortho</sub>), 8.95 (dd,  $^3J_{\text{HPT}} = 28.0$ ,  $^3J_{\text{HH}} = 6.7$ , 4H, **3a**<sub>Pyortho</sub>), 8.70 (dd,  $^3J_{\text{HPT}} = 27.9$ ,  $^3J_{\text{HH}} = 6.7$ , 2H, **3b**<sub>Pyortho'</sub>), 8.21 (d,  $^3J_{\text{HH}} = 8.1$ , 2H, **3b**<sub>Phortho'</sub>), 8.13 (d,  $^3J_{\text{HH}} = 7.5$ , 2H, **3a**<sub>Phortho'</sub>), 8.12 (m, 1H, **3b**<sub>Pypara</sub>), 8.03 (m, 2H, **3a**<sub>Pypara</sub>), 8.01 (m, 1H, **3b**<sub>Pypara'</sub>), 7.68 (dd, 2H, **3b**<sub>Pymeta</sub>), 7.60 (m, 1H, **3b**<sub>Phpara'</sub>), 7.58, (m, 1H, **3a**<sub>Phpara'</sub>), 7.56 (m, 4H, **3a**<sub>Pyortho</sub>) 8.03, (**3a**<sub>Pymeta</sub>), 7.49 (m, 1H, **3a**<sub>Phpara</sub>), 7.47 (m, 2H, **3b**<sub>Phmeta'</sub>), 7.46 (m, 2H, **3a**<sub>Phmeta'</sub>), 7.45 (d, 2H, **3a**<sub>Phortho</sub>), 7.43 (m, 2H, **3b**<sub>Pymeta'</sub>), 7.26 (dd,  $^3J_{\text{HH}} = 6.7$ ,  $^3J_{\text{HH}} = 6.7$ , 2H, **3a**<sub>Phmeta</sub>), 7.06 (t,  $^3J_{\text{HH}} = 7.5$ , 1H, **3b**<sub>Phpara</sub>), 6.94 (dd,  $^3J_{\text{HH}} = 7.6$ ,  $^3J_{\text{HH}} = 7.6$ , 2H, **3b**<sub>Phmeta</sub>), 6.68 (d,  $^3J_{\text{HH}} = 8.1$ , 2H, **3b**<sub>Phortho</sub>), 4.93 (s, **3b**<sub>C-OH</sub>).

$^{13}\text{C NMR}$  (151 MHz,  $d_3$ -MeCN)  $\delta$ : 190.3 (q, CO, **3a**<sub>PhCO</sub>), 188.1 (q, CO, **3a**<sub>PhCO'</sub>), 186.4 (q, CO, **3b**<sub>PhCO'</sub>), 159.3 (q,  $^2J_{\text{CPT}} = 48.6$ , **3b**<sub>triazoleC4</sub>), 150.5 (**3b**<sub>Pyortho'</sub>), 150.4 (**3b**<sub>Pyortho</sub>), 150.1 (**3a**<sub>Pyortho</sub>), 147.9 (q,  $^3J_{\text{CPT}} = 25.8$ , **3b**<sub>triazoleC5</sub>), 147.1 (q,  $^4J_{\text{CPT}} = 13.6$ , **3b**<sub>Phipso</sub>), 145.6 (q,  $^3J_{\text{CPT}} = 33.1$ , **3a**<sub>triazole4</sub>), 143.2 (**3b**<sub>Pypara</sub>), 143.0 (**3b**<sub>Pypara'</sub>), 142.9 ( $^4J_{\text{CPT}} = 6$ , **3a**<sub>Pypara</sub>), 142.2 (q,  $^2J_{\text{CPT}} = 33.7$ , **3a**<sub>triazole5</sub>), 138.1 (q, **3a**<sub>Phipso</sub>), 137.7 (q, superimposed **3a**<sub>Phipso'</sub> + **3b**<sub>Phipso'</sub>), 134.3 (**3a**<sub>Phpara</sub>), 134.1 (**3a**<sub>Phpara'</sub>), 134.0 (**3b**<sub>Phpara'</sub>), 131.3 (**3a**<sub>Phortho'</sub>), 131.2 (**3b**<sub>Phortho'</sub>), 129.6 (**3a**<sub>Phortho</sub>), 129.3 (**3a**<sub>Phmeta</sub>), 129.2 (**3b**<sub>Phmeta'</sub>), 129.1 (**3a**<sub>Phmeta'</sub>), 128.5 (**3b**<sub>Phmeta</sub>), 128.1 (**3b**<sub>Phpara</sub>), 127.2 ( $^3J_{\text{CPT}} = 26.5$ , **3b**<sub>Pymeta'</sub>), 127.1 ( $^3J_{\text{CPT}} = 25.7$ , **3b**<sub>Pymeta</sub>), 127.0 ( $^3J_{\text{CPT}} = 27.4$ , **3a**<sub>Pymeta</sub>), 125.3 (s, **3b**<sub>Phortho</sub>), 103.0 (q, **3b**<sub>C-OH</sub>).

$^{195}\text{Pt NMR}$  (107 MHz,  $d_3$ -MeCN)  $\delta$ : 689 (**3a**), 785 (**3b**).

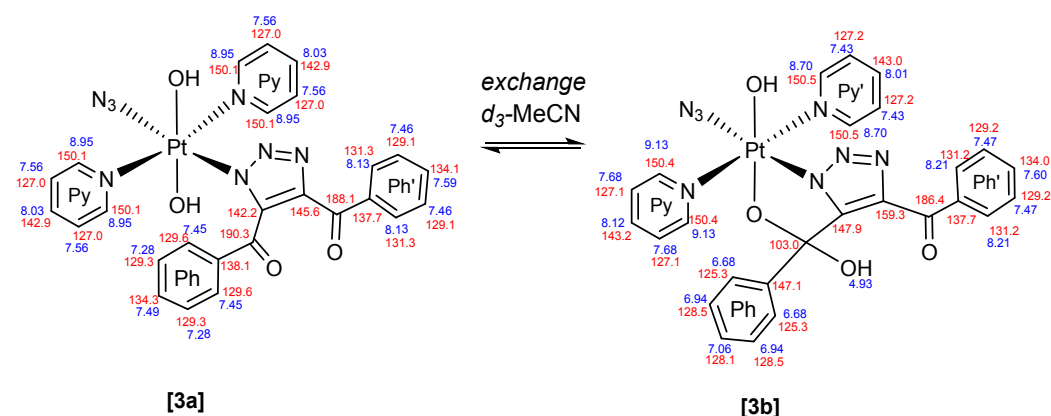

**Figure S3.** NMR spectral assignments ( $^1\text{H}$  blue,  $^{13}\text{C}$  red) for **3a** and **3b**.

## ESI-MS, MS/MS and HRMS of complex 3 (3a/3b)

ESI-MS (MeCN)  $m/z$ : 1433.29 ( $[\mathbf{3}_2+\text{Na}]^+$ ,  $([\text{Pt}(\text{N}_3)(\text{C}_{16}\text{H}_{10}\text{N}_3\text{O}_2)(\text{OH})_2(\text{py})_2]_2+\text{Na})^+$ ,  $\text{C}_{52}\text{H}_{44}\text{N}_{16}\text{NaO}_8\text{Pt}_2$  calcd. 1433.27), 728.14 ( $[\mathbf{3}+\text{Na}]^+$  ( $[\text{Pt}(\text{N}_3)(\text{C}_{16}\text{H}_{10}\text{N}_3\text{O}_2)(\text{OH})_2(\text{py})_2]_2+\text{Na})^+$ ,  $\text{C}_{26}\text{H}_{22}\text{N}_8\text{NaO}_4\text{Pt}$  calcd. 728.13), 688.15 ( $[\mathbf{3} - \text{OH}]^+$ ,  $[\text{Pt}(\text{N}_3)(\text{C}_{16}\text{H}_{10}\text{N}_3\text{O}_2)(\text{OH})(\text{py})_2]^+$ ,  $\text{C}_{26}\text{H}_{21}\text{N}_8\text{O}_3\text{Pt}$ , calcd. 688.14).

MS/MS (706.15)  $m/z$ : 688.140 ( $[\mathbf{3} - \text{OH}]^+$ ,  $[\text{Pt}(\text{N}_3)(\text{C}_{16}\text{H}_{10}\text{N}_3\text{O}_2)(\text{OH})(\text{py})_2]^+$ ,  $\text{C}_{26}\text{H}_{21}\text{N}_8\text{O}_3\text{Pt}$ , calcd. 688.134), 567.084 ( $[\mathbf{3} - \text{PhOH}, \text{N}_3]^+$ ,  $\text{C}_{19}\text{H}_{26}\text{N}_5\text{O}_3\text{Pt}$ , calcd. 567.168), 541.096 ( $[\mathbf{3} - \text{PhCO}, \text{N}_3, \text{OH}]^+$ ,  $\text{C}_{19}\text{H}_{16}\text{N}_5\text{O}_2\text{Pt}$ , calcd. 541.095), 370.055 ( $[\text{Pt}(\text{OH})(\text{py})_2]^+$ ,  $\text{C}_{10}\text{H}_{11}\text{N}_2\text{OPt}$  calcd. 370.055).

HRMS (MeCN)  $r$ .

(MeCN)  $m/z$ : 70

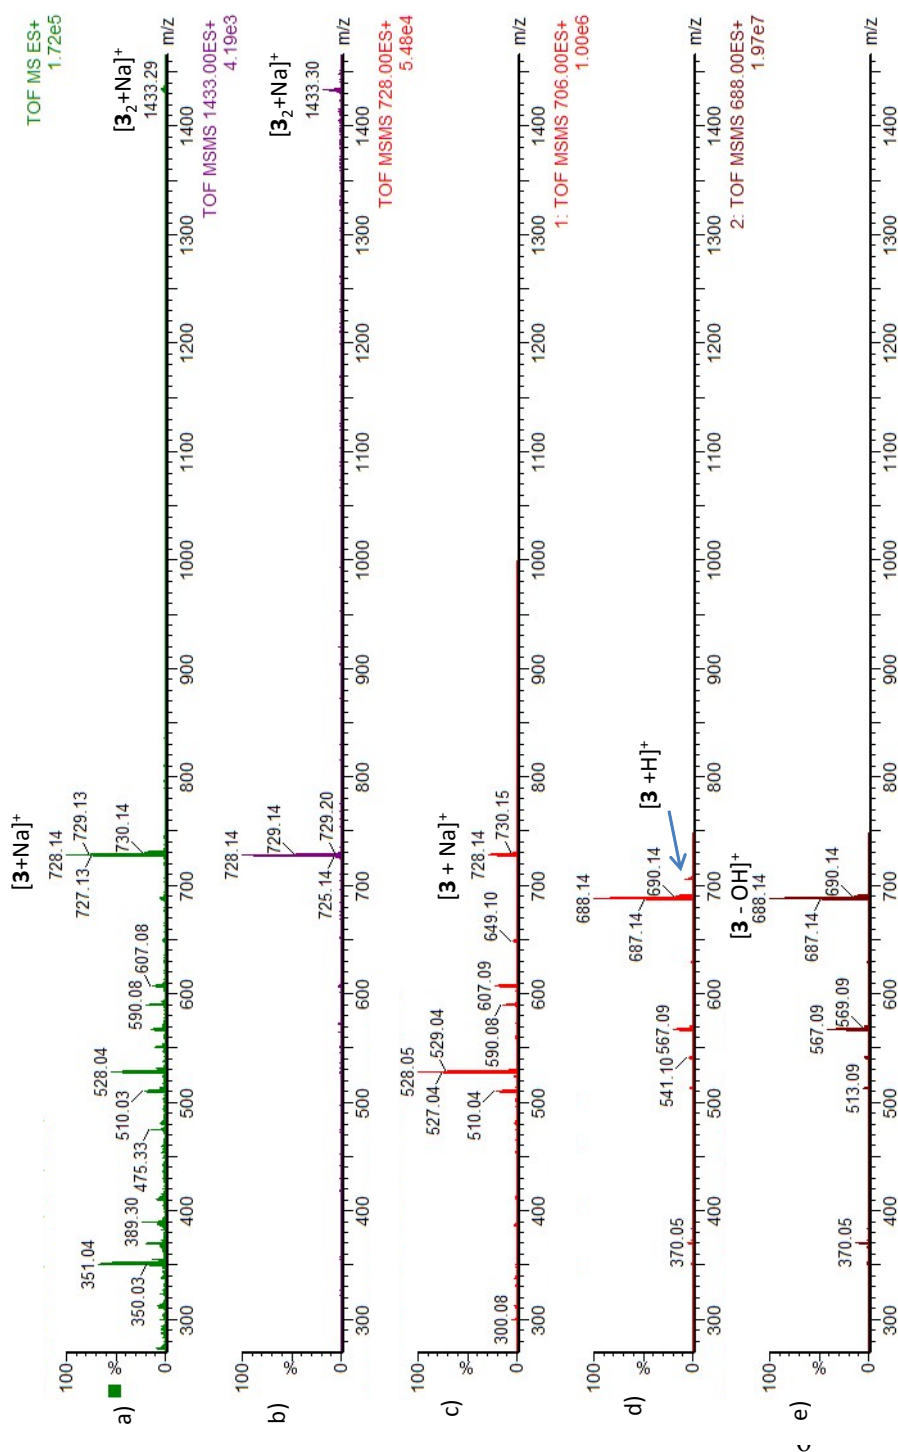

**Figure S4.** a) ESI-MS of complex **3** (MeCN). MS/MS fragmentation of species; b)  $[(\mathbf{3})_2 + \text{Na}]^+$  (1433  $m/z$ ); c)  $[\mathbf{3} + \text{Na}]^+$  (728  $m/z$ ); d)  $[\mathbf{3} + \text{H}]^+$  (706  $m/z$ ) and e)  $[\mathbf{3} - \text{OH}]^+$  (688  $m/z$ ).

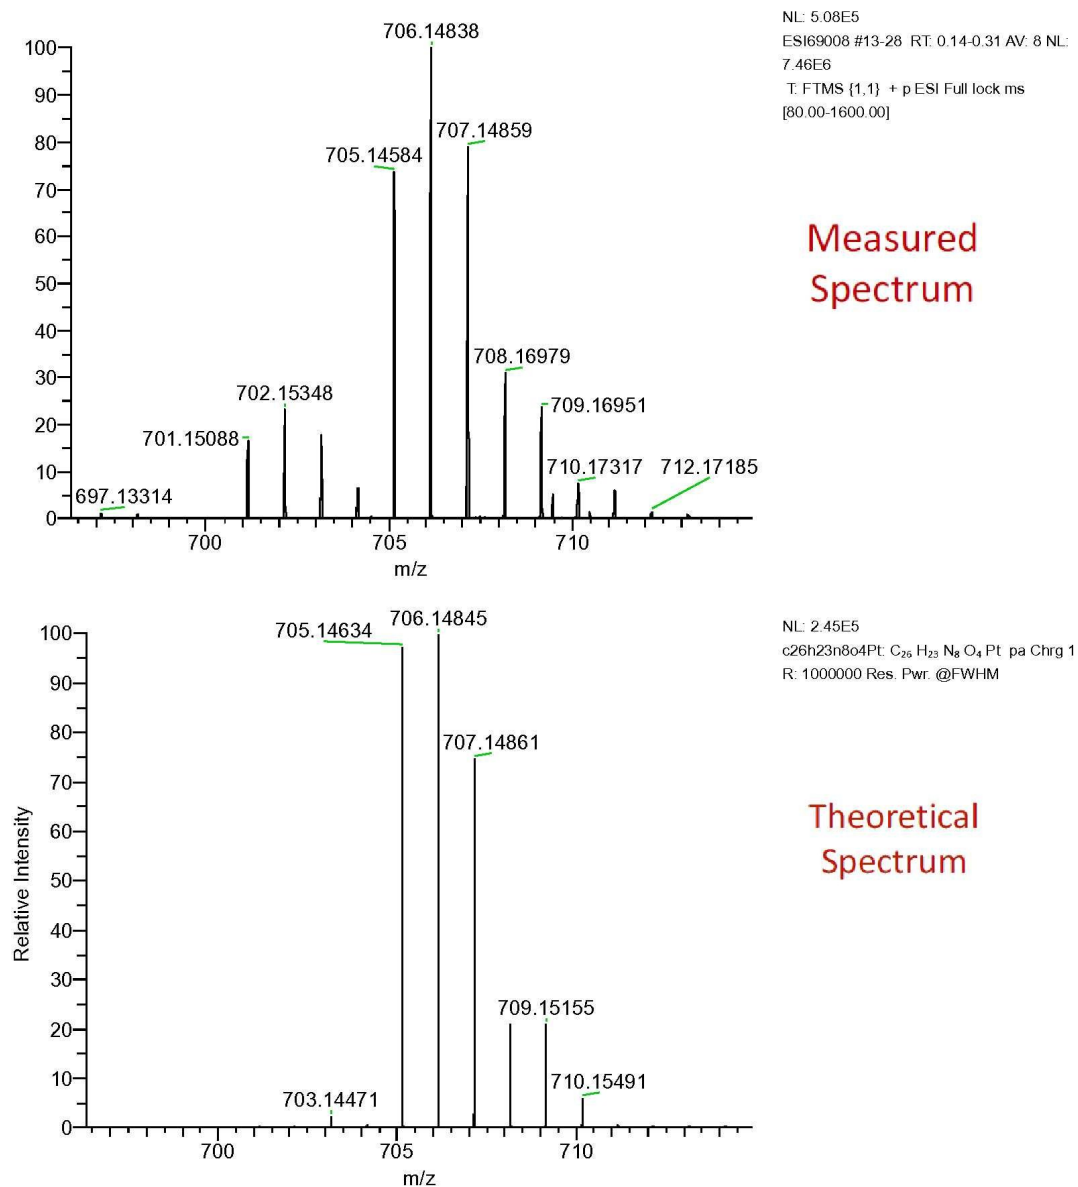

**Figure S5.** HRMS of complex **3** species  $[\text{M}+\text{H}]^+$  (706.1484  $m/z$ ).

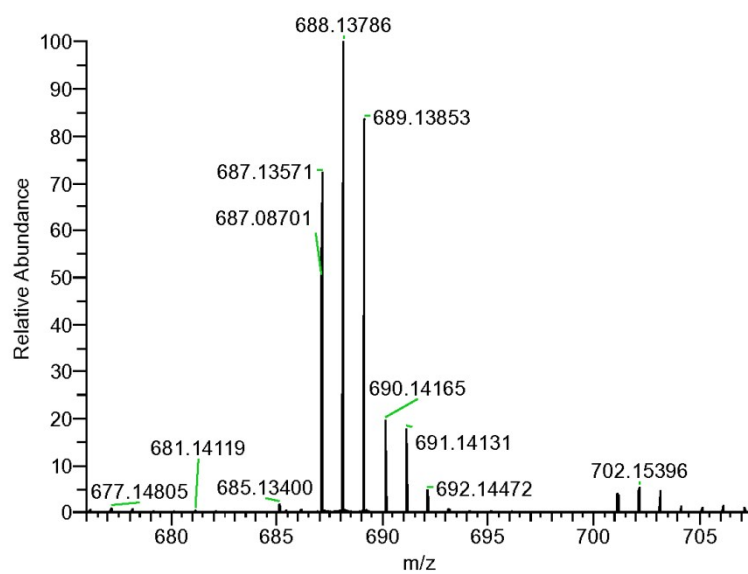

NL: 1.76E7  
 ESI70243 #15-27 RT: 0.17-0.31 AV: 7 NL:  
 1.76E+007  
 T: FTMS {1,1} + p ESI Full ms  
 [80.00-1600.00]

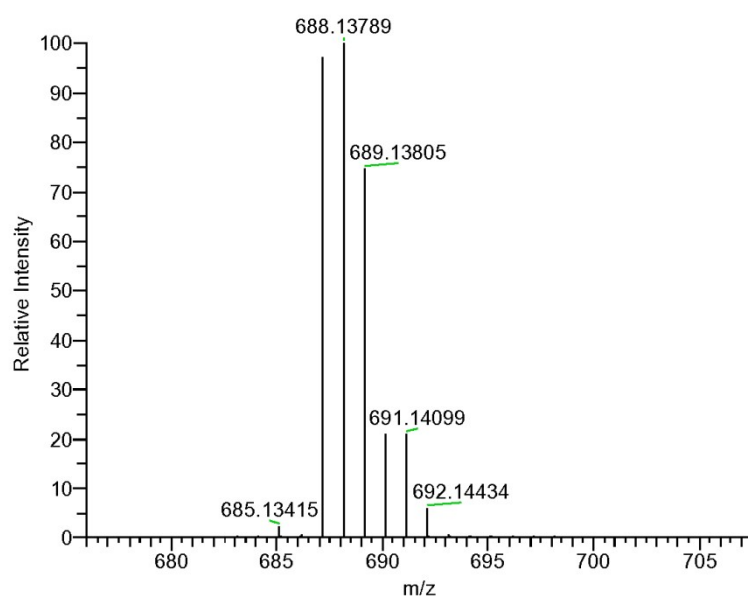

NL: 2.46E5  
 c26h21n8o3pt C<sub>26</sub> H<sub>21</sub> N<sub>8</sub> O<sub>3</sub> Pt pa Chrg 1  
 R: 1000000 Res. Pwr: @FWHM

Figure S6. HRMS of complex **3** species  $[3 - OH]^+$  (688.1379  $m/z$ ).



## UV-Vis spectra

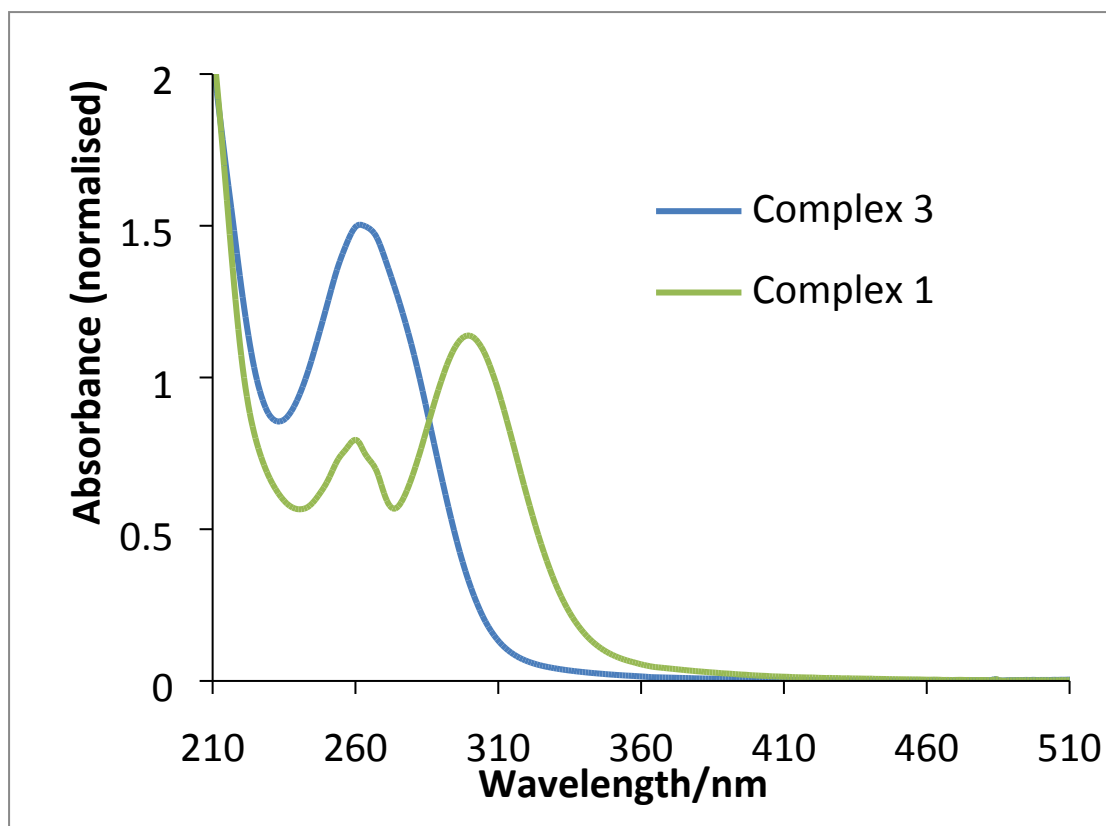

Figure S7. UV-Vis spectrum (H<sub>2</sub>O/MeCN) of complex 1 and complex 3.

## IR spectra

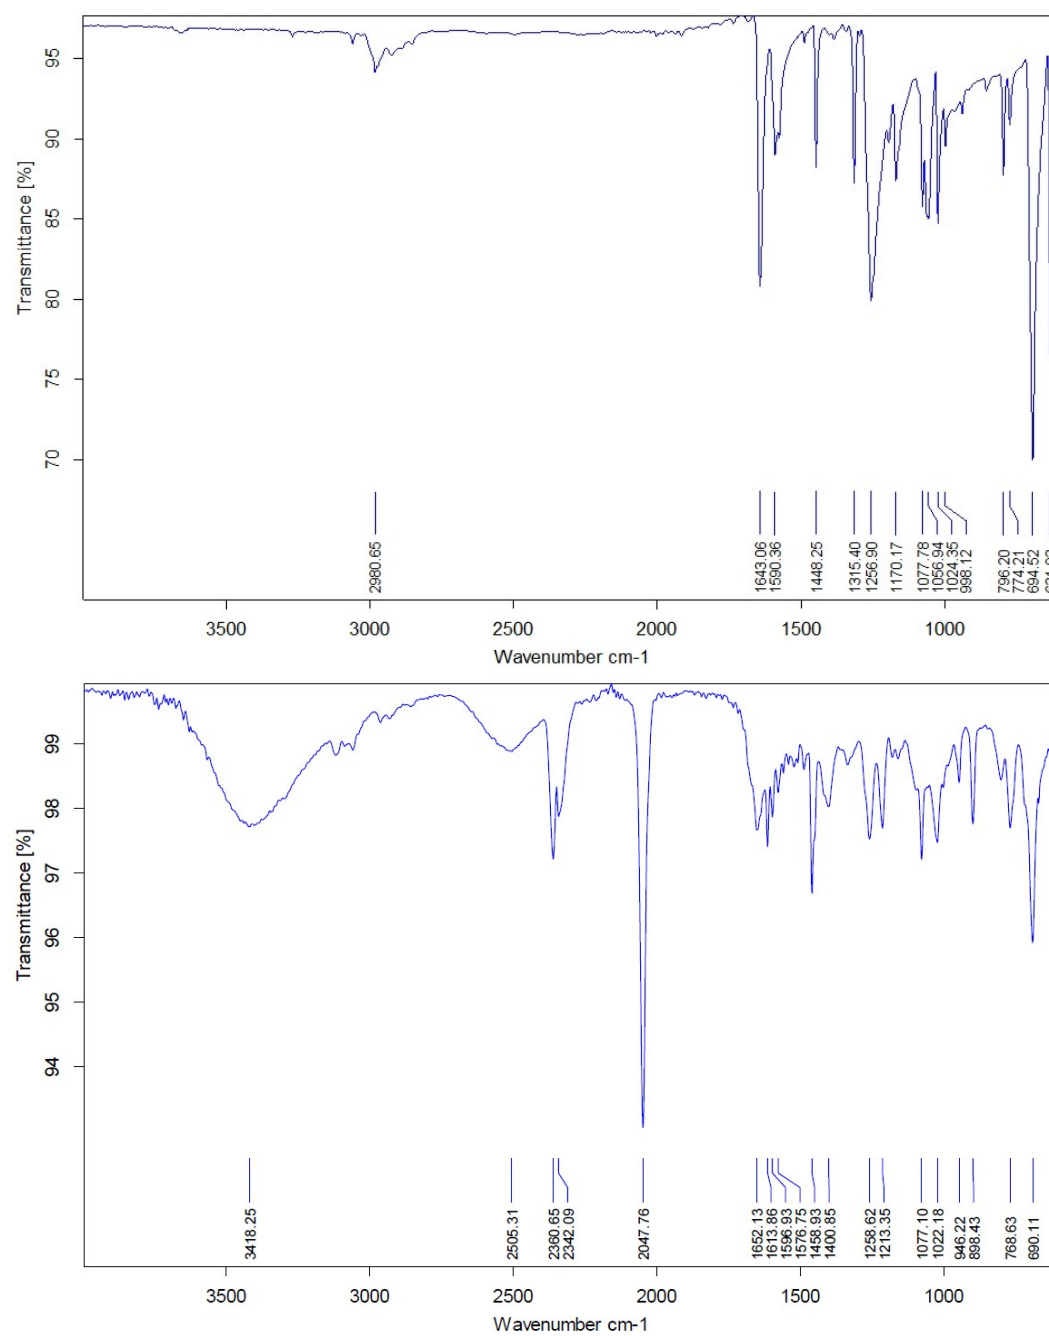

**Figure S8.** IR of a) starting material 1,4-diphenyl-2-butyne-1,4-dione (**2**) (solid) and b) complex **3** (*d*<sub>4</sub>-MeOH).

## NMR kinetics

The rate of exchange was measured using a selective saturation transfer experiment. A selective  $180^\circ$  pulse was used to invert the **3b**  $\text{Ph}_m$  resonance at 6.94 ppm. After a delay, a non-selective  $90^\circ$  was applied prior to acquisition of the  $^1\text{H}$  NMR spectrum. By varying the delay the exchange between the **3b**  $\text{Ph}_m$  resonance at 6.94 ppm and the **3a**  $\text{Ph}_m$  resonance at 7.28 ppm could be followed. This was repeated in 5K steps from 298K to 338K. The exchange rates at each temperature were calculated by fitting the build-up curves using the CIFIT program<sup>1</sup> and are summarised in the table below. From the Eyring plot;  $\Delta H^\ddagger$  (kJ mol<sup>-1</sup>) = 25 ( $\pm 1$ ),  $\Delta S^\ddagger$  (J mol<sup>-1</sup> K<sup>-1</sup>) = -173( $\pm 4$ ) and  $\Delta G^\ddagger$  (298 K, kJ mol<sup>-1</sup>) = 76( $\pm 1$ ) were derived (errors were calculated from the regression analysis of the Eyring plot).

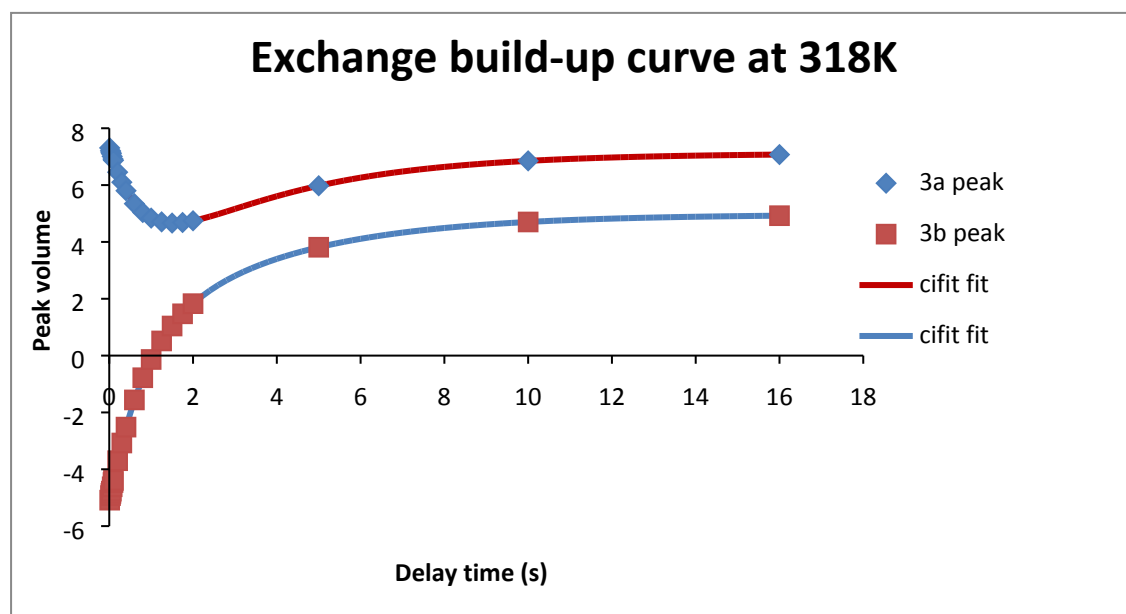

| temp/K | Exchange rate |
|--------|---------------|
| 298    | 2.85E-01      |
| 303    | 0.3077        |
| 308    | 3.33E-01      |
| 313    | 4.23E-01      |
| 318    | 0.5041        |
| 323    | 6.29E-01      |
| 328    | 7.43E-01      |
| 333    | 8.07E-01      |
| 338    | 0.9836        |

Figure S9. Eyring plot and rate table for **3a** to **3b** interconversion kinetics.<sup>3</sup>

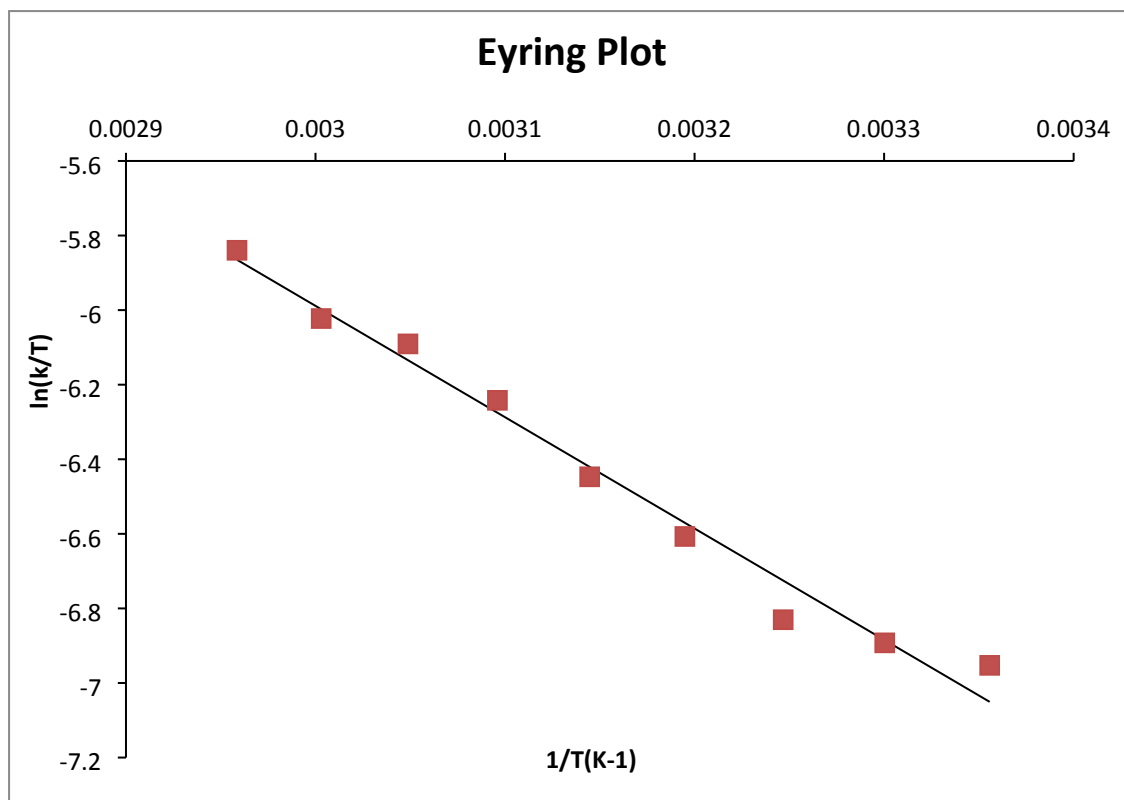

**Figure S10.** Build up Curve at 318 K, Exchange rate table for **3a** to **3b** interconversion kinetics and Eyring plot.

## X-Ray crystallographic data and tables

X-ray crystallographic tables and figures were produced using Olex2.<sup>4</sup> Crystal Data for  $C_{31}H_{32}N_8O_5Pt$  (3b.C<sub>5</sub>H<sub>10</sub>O) ( $M = 791.73$  g/mol): orthorhombic, space group Pbca (no. 61),  $a = 15.5699(6)$  Å,  $b = 13.6495(5)$  Å,  $c = 28.638(1)$  Å,  $V = 6086.3(4)$  Å<sup>3</sup>,  $Z = 8$ ,  $T = 100$  K,  $\mu(\text{MoK}\alpha) = 4.666$  mm<sup>-1</sup>,  $D_{\text{calc}} = 1.728$  g/cm<sup>3</sup>, 20849 reflections measured ( $6.94^\circ \leq 2\theta \leq 58.392^\circ$ ), 6965 unique ( $R_{\text{int}} = 0.0447$ ,  $R_{\text{sigma}} = 0.0511$ ) which were used in all calculations. The final  $R_1$  was 0.0414 ( $I > 2\sigma(I)$ ) and  $wR_2$  was 0.0779 (all data).

|                                               |                                                                   |
|-----------------------------------------------|-------------------------------------------------------------------|
| Identification code                           | 18KE08-1                                                          |
| Empirical formula                             | C <sub>31</sub> H <sub>32</sub> N <sub>8</sub> O <sub>5</sub> Pt  |
| Formula weight                                | 791.73                                                            |
| Temperature/K                                 | 100                                                               |
| Crystal system                                | orthorhombic                                                      |
| Space group                                   | Pbca                                                              |
| $a/\text{Å}$                                  | 15.5699(6)                                                        |
| $b/\text{Å}$                                  | 13.6495(5)                                                        |
| $c/\text{Å}$                                  | 28.638(1)                                                         |
| $\alpha/^\circ$                               | 90                                                                |
| $\beta/^\circ$                                | 90                                                                |
| $\gamma/^\circ$                               | 90                                                                |
| Volume/Å <sup>3</sup>                         | 6086.3(4)                                                         |
| $Z$                                           | 8                                                                 |
| $\rho_{\text{calc}}/\text{g cm}^{-3}$         | 1.728                                                             |
| $\mu/\text{mm}^{-1}$                          | 4.666                                                             |
| $F(000)$                                      | 3136.0                                                            |
| Crystal size/mm <sup>3</sup>                  | 0.651 × 0.321 × 0.155                                             |
| Radiation                                     | MoK $\alpha$ ( $\lambda = 0.71073$ )                              |
| $2\theta$ range for data collection/ $^\circ$ | 6.94 to 58.392                                                    |
| Index ranges                                  | $-19 \leq h \leq 19$ , $-9 \leq k \leq 17$ , $-31 \leq l \leq 39$ |
| Reflections collected                         | 20849                                                             |
| Independent reflections                       | 6965 [ $R_{\text{int}} = 0.0447$ , $R_{\text{sigma}} = 0.0511$ ]  |
| Data/restraints/parameters                    | 6965/0/408                                                        |
| Goodness-of-fit on $F^2$                      | 1.116                                                             |
| Final $R$ indexes [ $I > 2\sigma(I)$ ]        | $R_1 = 0.0414$ , $wR_2 = 0.0735$                                  |
| Final $R$ indexes [all data]                  | $R_1 = 0.0537$ , $wR_2 = 0.0779$                                  |
| Largest diff. peak/hole / e Å <sup>-3</sup>   | 1.69/-1.80                                                        |

| Atom | Atom | Length/Å | Atom | Atom | Length/Å |
|------|------|----------|------|------|----------|
|------|------|----------|------|------|----------|

|     |     |          |     |     |           |
|-----|-----|----------|-----|-----|-----------|
| Pt1 | N1  | 1.998(4) | C26 | C14 | 1.526(6)  |
| Pt1 | N3  | 2.034(4) | C26 | C36 | 1.384(7)  |
| Pt1 | N15 | 2.035(4) | N18 | C28 | 1.357(6)  |
| Pt1 | O5  | 2.017(3) | N18 | C40 | 1.339(6)  |
| Pt1 | N18 | 2.031(4) | C23 | C24 | 1.382(7)  |
| Pt1 | O6  | 1.982(3) | C23 | C22 | 1.379(7)  |
| N1  | N13 | 1.360(5) | C14 | C16 | 1.522(6)  |
| N1  | C16 | 1.340(6) | C14 | O7  | 1.428(5)  |
| O3  | C5  | 1.224(6) | C21 | C22 | 1.385(6)  |
| C5  | C11 | 1.474(6) | C28 | C37 | 1.377(8)  |
| C5  | C20 | 1.491(7) | C32 | C31 | 1.386(10) |
| C10 | C20 | 1.401(8) | C40 | C39 | 1.385(7)  |
| C10 | C29 | 1.391(7) | C33 | C34 | 1.365(8)  |
| C11 | N14 | 1.375(6) | C39 | C38 | 1.389(9)  |
| C11 | C16 | 1.379(7) | C34 | C35 | 1.365(9)  |
| N13 | N14 | 1.314(5) | O43 | C44 | 1.417(8)  |
| C20 | C32 | 1.396(8) | O43 | C42 | 1.394(8)  |
| N3  | C25 | 1.348(6) | C37 | C38 | 1.358(9)  |
| N3  | C21 | 1.345(6) | C36 | C35 | 1.392(7)  |
| N15 | N16 | 1.218(6) | C29 | C30 | 1.370(10) |
| O5  | C14 | 1.397(5) | C30 | C31 | 1.383(11) |
| N16 | N17 | 1.142(6) | C44 | C45 | 1.534(10) |
| C27 | C26 | 1.382(7) | C41 | C42 | 1.486(10) |
| C27 | C33 | 1.393(7) | C41 | C1  | 1.536(11) |
| C25 | C24 | 1.382(7) | C45 | C1  | 1.509(10) |

| Table S3. Bond Angles for 18KE08-1. |      |      |            |      |      |      |          |
|-------------------------------------|------|------|------------|------|------|------|----------|
| Atom                                | Atom | Atom | Angle/°    | Atom | Atom | Atom | Angle/°  |
| N1                                  | Pt1  | N3   | 89.28(15)  | C27  | C26  | C14  | 123.1(4) |
| N1                                  | Pt1  | N15  | 172.21(17) | C27  | C26  | C36  | 118.6(5) |
| N1                                  | Pt1  | O5   | 80.95(15)  | C36  | C26  | C14  | 117.8(4) |
| N1                                  | Pt1  | N18  | 91.41(16)  | C28  | N18  | Pt1  | 120.6(4) |
| N3                                  | Pt1  | N15  | 89.63(16)  | C40  | N18  | Pt1  | 119.3(3) |
| O5                                  | Pt1  | N3   | 86.62(15)  | C40  | N18  | C28  | 120.1(4) |
| O5                                  | Pt1  | N15  | 91.28(15)  | C22  | C23  | C24  | 119.2(5) |
| O5                                  | Pt1  | N18  | 88.73(14)  | C25  | C24  | C23  | 119.3(5) |
| N18                                 | Pt1  | N3   | 175.13(16) | O5   | C14  | C26  | 107.3(4) |
| N18                                 | Pt1  | N15  | 89.04(17)  | O5   | C14  | C16  | 109.9(4) |
| O6                                  | Pt1  | N1   | 100.95(15) | O5   | C14  | O7   | 106.1(4) |
| O6                                  | Pt1  | N3   | 94.32(16)  | C16  | C14  | C26  | 113.8(4) |
| O6                                  | Pt1  | N15  | 86.83(16)  | O7   | C14  | C26  | 111.8(4) |
| O6                                  | Pt1  | O5   | 177.88(14) | O7   | C14  | C16  | 107.6(4) |
| O6                                  | Pt1  | N18  | 90.28(16)  | N3   | C21  | C22  | 120.7(5) |

|     |     |     |          |     |     |     |          |
|-----|-----|-----|----------|-----|-----|-----|----------|
| N13 | N1  | Pt1 | 134.0(3) | N1  | C16 | C11 | 105.3(4) |
| C16 | N1  | Pt1 | 115.5(3) | N1  | C16 | C14 | 116.8(4) |
| C16 | N1  | N13 | 110.5(4) | C11 | C16 | C14 | 137.8(4) |
| O3  | C5  | C11 | 118.5(5) | C23 | C22 | C21 | 119.5(5) |
| O3  | C5  | C20 | 120.6(4) | N18 | C28 | C37 | 120.3(6) |
| C11 | C5  | C20 | 120.9(5) | C31 | C32 | C20 | 120.1(7) |
| C29 | C10 | C20 | 120.3(6) | N18 | C40 | C39 | 120.9(5) |
| N14 | C11 | C5  | 124.4(4) | C34 | C33 | C27 | 120.3(5) |
| N14 | C11 | C16 | 108.1(4) | C40 | C39 | C38 | 119.1(6) |
| C16 | C11 | C5  | 127.4(4) | C35 | C34 | C33 | 119.6(5) |
| N14 | N13 | N1  | 107.8(4) | C42 | O43 | C44 | 108.4(6) |
| N13 | N14 | C11 | 108.3(4) | C38 | C37 | C28 | 120.3(6) |
| C10 | C20 | C5  | 124.0(5) | C26 | C36 | C35 | 120.0(5) |
| C32 | C20 | C5  | 116.8(5) | C30 | C29 | C10 | 119.6(7) |
| C32 | C20 | C10 | 119.0(5) | C34 | C35 | C36 | 120.9(6) |
| C25 | N3  | Pt1 | 116.8(3) | C29 | C30 | C31 | 121.1(7) |
| C21 | N3  | Pt1 | 122.6(3) | O43 | C44 | C45 | 112.2(6) |
| C21 | N3  | C25 | 120.3(4) | C37 | C38 | C39 | 119.2(5) |
| N16 | N15 | Pt1 | 114.2(3) | C42 | C41 | C1  | 108.1(7) |
| C14 | O5  | Pt1 | 116.6(3) | C30 | C31 | C32 | 119.8(7) |
| N17 | N16 | N15 | 174.8(6) | C1  | C45 | C44 | 109.7(7) |
| C26 | C27 | C33 | 120.6(5) | O43 | C42 | C41 | 114.5(6) |
| N3  | C25 | C24 | 120.9(5) | C45 | C1  | C41 | 110.6(6) |

## Photochemistry of 3

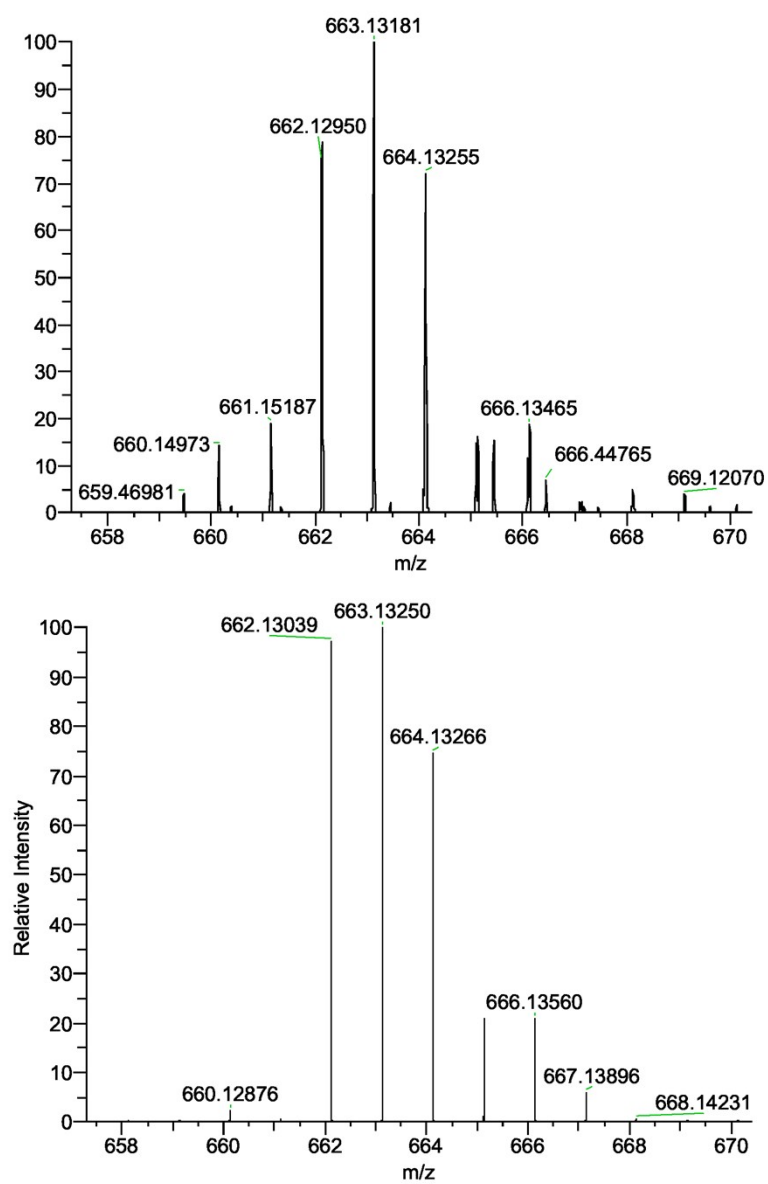

**Figure S11.** HRMS of photoproduct  $[3-N_3]^+$ : top (663.13181  $m/z$  measured), bottom (663.13250  $m/z$ ,  $C_{26}H_{22}N_5O_4Pt$  calculated), calc error -1.04 ppm.



## EPR experimental data

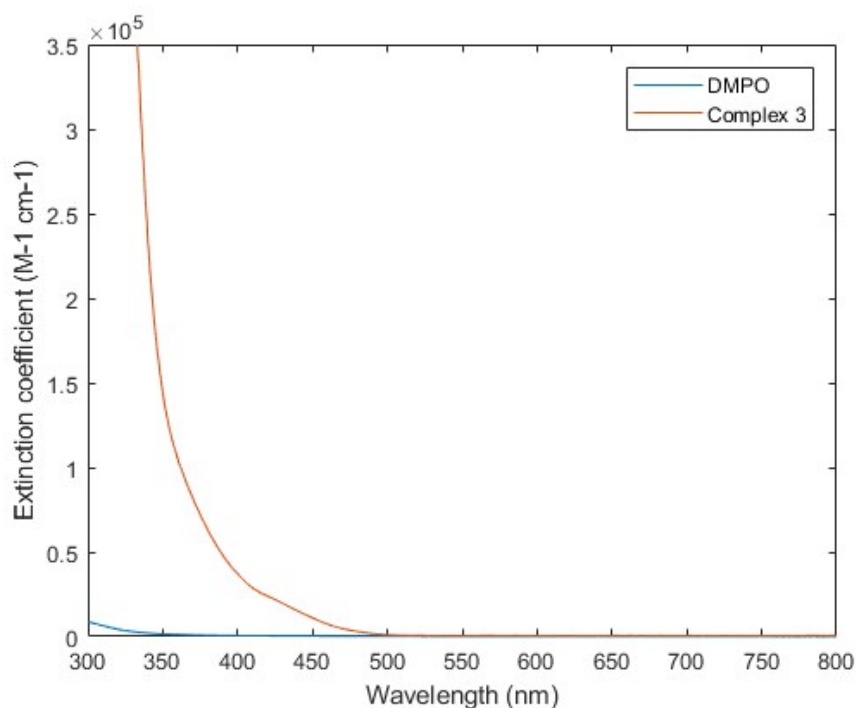

**Figure S12.** UV-Vis spectra (MeCN:H<sub>2</sub>O 1:9) of concentrated sample of complex **3** (10 mM) and DMPO (10 mM) showing extent of absorption into the visible region of the spectrum, acquired a 1 mm quartz cuvette. Complex **3** shows some absorption in the short blue, while DMPO shows negligible absorption in the visible.

### EPR sample preparation

DMPO was dissolved in MeCN at a concentration of 21 mM and was degassed in a Schlenk tube by performing 6 freeze-pump-thaw cycles, until no further gas bubbling was observed. The solution was then transferred to a N<sub>2</sub> glove-box and used to dissolve complex **3** (previously freeze-dried) to a concentration of 10.5 mM (with a molar ratio of DMPO:**3** of 2:1). This solution was pipetted into a 25  $\mu$ L glass microcapillary (IntraMark, Blaubrand), and both ends were sealed with *cristaseal* sealing wax (Hawksley). Finally, the microcapillary was placed in an EPR quartz tube (4 mm external diameter) and the tube was sealed with a septum.

### EPR experiments

The experimental setup consisted of a 1000 W Xe arc lamp coupled to the resonator (Bruker X-band Super High Sensitivity Probehead) of the EPR spectrometer (X-band EMXmicro, Bruker) through a liquid waveguide. The light was filtered before entering the waveguide, using a 410 nm long-pass filter followed by a 440 – 480 nm band pass filter. The measurement was carried out in continuous-wave mode, at X-band frequency (ca. 9.5 GHz) and room temperature. Fifty field scans of 8 mT width, with 30 s acquisition time per scan, were averaged to obtain each of the spectra plotted in figure S13. A receiver gain of 30 dB, modulation amplitude of 0.1 mT and microwave attenuation of 23.0 dB were used.

Quantification was done using the second integral of the spectra, by interpolation of a calibration curve of TEMPO solutions of known concentrations measured in the same conditions as the sample, in the dark. The steady state concentration of  $\text{DMPO-N}_3^\bullet$  was calculated from an averaged spectrum over the first 50 min of illumination, before the signal started to decay (Figure S14). For the final concentration of stable nitroxide, a spectrum averaged over 50 min recorded in the dark, after the  $\text{DMPO-N}_3^\bullet$  signal had fully decayed, was used.

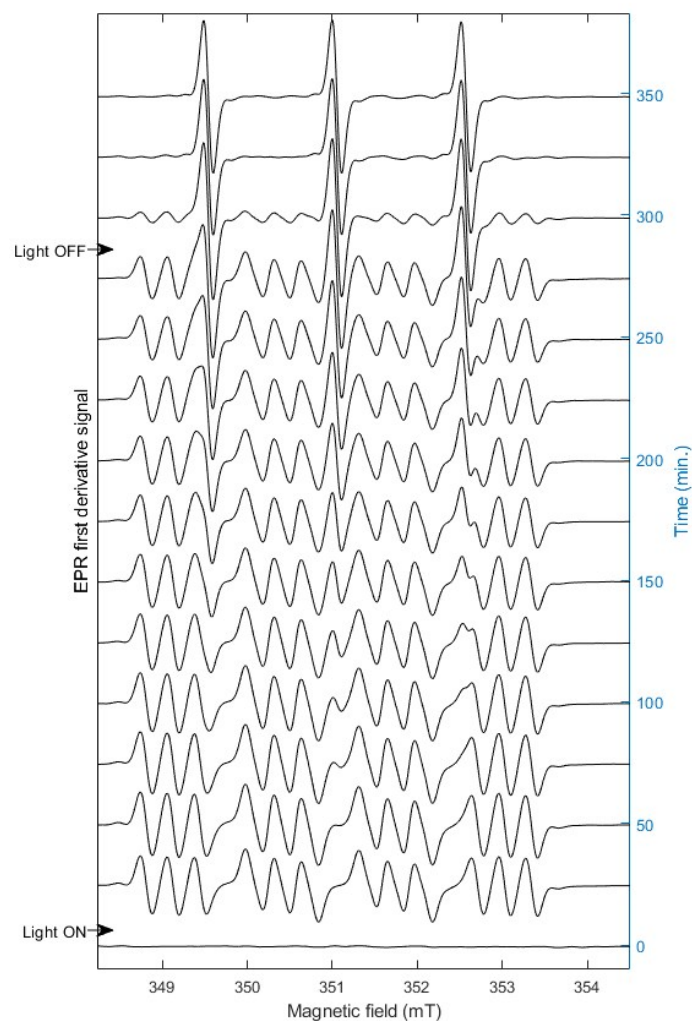

**Figure S13.** CW-EPR spectra showing the evolution of radicals from complex **3** under blue light illumination. Once the  $\text{DMPO-N}_3^\bullet$  had fully decayed after switching illumination off, only a very slow decay of the triplet signal was observed in the dark.

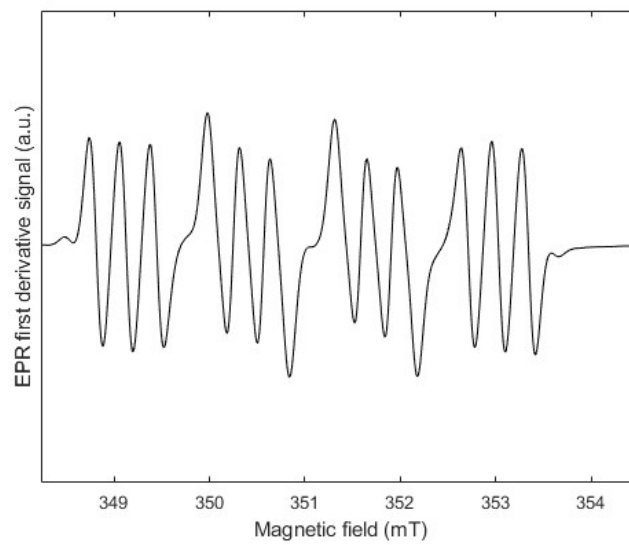

**Figure S14.** Average CW-EPR spectrum of complex **3** during the first 50 min of illumination, showing the characteristic multiplet structure of the DMPO-N<sub>3</sub><sup>•</sup> adduct.

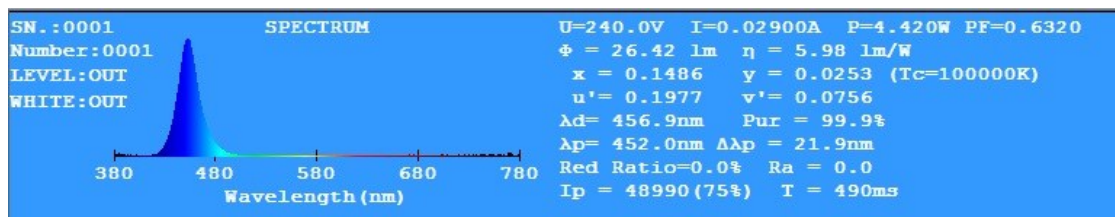

**Figure S15.** Spectral output of MiniSun (GU10 27 SMD) blue LED bulb,  $\lambda_{\text{max}} = 452 \text{ nm}$ .

## References

- 1 A. Bax and M. F. Summers, *J. Am. Chem. Soc.*, 1986, **108**, 2093–2094.
- 2 N. J. Farrer, J. A. Woods, L. Salassa, Y. Zhao, K. S. Robinson, G. Clarkson, F. S. Mackay and P. J. Sadler, *Angew. Chem. Int. Ed. Engl.*, 2010, **49**, 8905–8.
- 3 A. D. Bain and J. A. Cramer, *J. Magn. Reson. - Ser. A*, 1996, **118**, 21–27.
- 4 O. V. Dolomanov, L. J. Bourhis, R. J. Gildea, J. A. K. Howard and H. Puschmann, *J. Appl. Crystallogr.*, 2009, **42**, 339–341.
